# Supplementary material for: Xylan Deconstruction by Thermophilic Thermoanaerobacterium bryantii Hemicellulases Is Stimulated by Two Oxidoreductases
Source: MDPI journal article supplement (doi:10.3390/catal12020182), 2022-01-31
Supplement: s1 [file s1]

## Supplementary materials

### Xylan Deconstruction by Thermophilic *Thermoanaerobacterium bryantii* Hemicellulases is Stimulated by Two Oxidoreductases

Zhuolin Yi <sup>1,2,†</sup>, Xiaoyun Su <sup>1,2,†</sup>, Abigail E. Asangba <sup>1,2,3,†</sup>, Ahmed M. Abdel-Hamid <sup>2,4</sup>, Siddhartha Chakraborty <sup>2,5</sup>, Dylan Dodd <sup>1,2,5</sup>, Peter G. Stroot <sup>3</sup>, Roderick I. Mackie <sup>1,2,3</sup> and Isaac Cann <sup>1,2,3,5,\*</sup>

<sup>1</sup> Energy Biosciences Institute, 1206 West Gregory Drive, University of Illinois, Urbana, IL 61801, USA; yizl1982@hotmail.com (Z.Y.); suxiaoyun@caas.cn (X.S.); Asangba.Abigail@mayo.edu (A.E.A.); ddodd2@stanford.edu (D.D.); r-mackie@illinois.edu (R.I.M.)

<sup>2</sup> Carl R. Woese Institute for Genomic Biology, 1206 West Gregory Drive, University of Illinois, Urbana, IL 61801, USA; ahetta@illinois.edu (A.M.A.-H.); sc99@illinois.edu (S.C.)

<sup>3</sup> Department of Animal Sciences, 1207 West Gregory Drive, University of Illinois, Urbana, IL 61801, USA; pgstroot@gmail.com

<sup>4</sup> Department of Botany and Microbiology, Faculty of Science, Minia University, El-Mina 61519, Egypt

<sup>5</sup> Department of Microbiology, University of Illinois, Urbana, IL 61801, USA

\* Correspondence: icann@illinois.edu; Tel.: +1-217-333-2090

† These authors contributed equally to this work.

**Supplemental Table S1.** Characteristics that differentiate strain mel9<sup>T</sup> from other species of *Thermoanaerobacterium*.

| Characteristics      | Strain mel9 <sup>T</sup> | <i>T.</i><br><i>thermosaccharolyticum</i> <sup>#</sup> | <i>T.</i><br><i>aotearoense</i> <sup>#</sup> | <i>T.</i><br><i>saccharolyticum</i> <sup>#</sup> | <i>T.</i><br><i>thermosulfurigenes</i> <sup>#</sup> | <i>T.</i><br><i>xylanolyticum</i> <sup>#</sup> |
|----------------------|--------------------------|--------------------------------------------------------|----------------------------------------------|--------------------------------------------------|-----------------------------------------------------|------------------------------------------------|
| G + C content (mol%) | 37.7                     | 29–32                                                  | 34.5–35                                      | 36                                               | 32.6                                                | 36.1                                           |
| pH range             | 5.0–8.0                  | 6.5–8.5                                                | 3.8–6.8                                      | 5.0–7.5                                          | 4.0–7.6                                             | 5.0–7.5                                        |
| Optimum pH           | 6.8–7.0                  | 7.8                                                    | 5.2                                          | 6.0                                              | 5.5–6.5                                             | 6.0                                            |
| Optimum temp (°C)    | 62–65                    | 55–60                                                  | 60.1–62.6                                    | 60                                               | 60                                                  | 60                                             |
| Maximum temp (°C)    | 69                       | 62                                                     | 65.7                                         | 68–70                                            | 75                                                  | 70                                             |
| Spore formation      | –                        | +                                                      | +                                            | +                                                | +                                                   | +                                              |
| <b>Fermentation</b>  |                          |                                                        |                                              |                                                  |                                                     |                                                |
| <b>End Products*</b> |                          |                                                        |                                              |                                                  |                                                     |                                                |
| Lactate              | –                        | +                                                      | +                                            | +                                                | +                                                   | –                                              |
| Acetate              | +                        | +                                                      | +                                            | +                                                | +                                                   | +                                              |
| Butyrate             | +                        | +                                                      | –                                            | –                                                | –                                                   | –                                              |
| Ethanol              | +                        | +                                                      | +                                            | +                                                | +                                                   | +                                              |
| Butanol              | +                        | –                                                      | –                                            | –                                                | –                                                   | –                                              |
| CO <sub>2</sub>      | +                        | +                                                      | +                                            | +                                                | +                                                   | +                                              |
| H <sub>2</sub>       | +                        | +                                                      | +                                            | +                                                | +                                                   | +                                              |

<sup>#</sup>From liu et al. [63], <sup>\*</sup>From Lee et al. [44], except data on *T. thermosaccharolyticum* from Jones and Woods [64].

**Supplemental Table S2.** Amino acid sequence identities among the enzymes in the hemi-cellulase gene clusters from *T. bryantii* (*T.b*), *T. xylanolyticum* (*T.x*) and *T. thermosaccharolyticum* (*T.t*).

| Sequence Identity | Agu67 | HEOA  | HEOB  | Xyl52 | Xyl39 | Axe1  |
|-------------------|-------|-------|-------|-------|-------|-------|
| <i>T.b–T.x</i>    | 86.5% | 91.5% | 95.8% | 89.3% | 86.6% | 92.5% |
| <i>T.b–T.t</i>    | 91.3% | 95.1% | 91.9% | 92.0% | 95.0% | 99.4% |
| <i>T.b–T.s</i>    | 84.8% | 90.2% | 91.6% | 86.0% | 89.0% | 92.5% |

**Supplemental Table S3.** End products of synergistic hydrolysis of different xylan-containing plant biomass by the seven enzymes encoded by the *T. bryantii* hemicellulase gene cluster<sup>a,b,c</sup>

| Enzymes Combination | Substrates | End-Products (mM) |           |           | Substrates | End-Products (mM) |           |           |
|---------------------|------------|-------------------|-----------|-----------|------------|-------------------|-----------|-----------|
|                     |            | X1                | X2        | X3        |            | X1                | X2        | X3        |
| 1                   | BeeWX      | 0.1 ± 0.0         | 3.5 ± 0.0 | 2.0 ± 0.2 | BWV        | ND                | 0.5 ± 0.2 | 0.4 ± 0.1 |
| 2                   |            | 0.8 ± 0.0         | 3.9 ± 0.1 | 1.6 ± 0.1 |            | 1.7 ± 0.2         | 1.2 ± 0.2 | 0.5 ± 0.1 |
| 3                   |            | 10.6 ± 0.4        | 0.8 ± 0.0 | <0.1      |            | 2.1 ± 0.6         | 0.7 ± 0.5 | 0.3 ± 0.2 |
| 4                   |            | 11.5 ± 0.6        | 0.6 ± 0.1 | <0.1      |            | 4.3 ± 0.2         | 0.5 ± 0.0 | 0.2 ± 0.0 |
| 5                   |            | 12.9 ± 1.5        | 0.4 ± 0.0 | ND        |            | 7.6 ± 0.6         | 1.1 ± 0.2 | 0.3 ± 0.2 |
| 6                   |            | 12.5 ± 1.6        | 0.3 ± 0.0 | ND        |            | 9.7 ± 0.1         | 1.3 ± 0.0 | 0.3 ± 0.0 |
| 7                   |            | 13.8 ± 0.9        | 0.3 ± 0.0 | ND        |            | 12.5 ± 0.5        | 1.3 ± 0.1 | 0.2 ± 0.0 |
| 8                   |            | 18.8 ± 1.1        | 0.4 ± 0.1 | ND        |            | 16.1 ± 0.3        | 1.0 ± 0.2 | 0.2 ± 0.1 |
| 9                   |            | 14.4 ± 0.8        | 0.2 ± 0.1 | ND        |            | 15.2 ± 0.7        | 0.6 ± 0.0 | <0.1      |
| 10                  |            | 17.8 ± 1.2        | 0.7 ± 0.1 | ND        |            | 17.0 ± 0.4        | 1.1 ± 0.2 | 0.2 ± 0.0 |
| 1                   | OSX        | ND                | 0.8 ± 0.1 | 0.5 ± 0.0 | LAX        | <0.1              | 1.7 ± 0.2 | 1.0 ± 0.1 |
| 2                   |            | 1.0 ± 0.1         | 0.7 ± 0.3 | 0.2 ± 0.0 |            | 0.9 ± 0.1         | 1.7 ± 0.2 | 0.7 ± 0.0 |
| 3                   |            | 2.3 ± 0.3         | 0.3 ± 0.0 | <0.1      |            | 2.9 ± 0.1         | 0.7 ± 0.0 | 0.3 ± 0.0 |
| 4                   |            | 3.0 ± 0.5         | 0.3 ± 0.0 | <0.1      |            | 3.3 ± 0.0         | 0.7 ± 0.0 | 0.2 ± 0.0 |
| 5                   |            | 5.7 ± 0.1         | 0.3 ± 0.0 | ND        |            | 5.5 ± 0.2         | 0.7 ± 0.1 | 0.2 ± 0.0 |
| 6                   |            | 5.6 ± 0.1         | 0.3 ± 0.0 | ND        |            | 5.7 ± 0.6         | 0.9 ± 0.1 | 0.2 ± 0.0 |
| 7                   |            | 6.4 ± 0.8         | 0.2 ± 0.0 | ND        |            | 5.9 ± 0.2         | 0.7 ± 0.0 | 0.1 ± 0.0 |
| 8                   |            | 6.6 ± 0.3         | 0.2 ± 0.0 | ND        |            | 7.6 ± 0.7         | 0.5 ± 0.1 | 0.1 ± 0.1 |
| 9                   |            | 8.3 ± 0.0         | 0.2 ± 0.0 | ND        |            | 7.3 ± 0.1         | 0.6 ± 0.0 | 0.2 ± 0.0 |
| 10                  |            | 7.4 ± 1.1         | 0.2 ± 0.0 | ND        |            | 6.3 ± 0.2         | 0.6 ± 0.1 | 0.1 ± 0.0 |
| 1                   | WAX        | 0.1 ± 0.1         | 1.1 ± 0.1 | 0.5 ± 0.0 | Miscanthus | 0.2 ± 0.0         | 0.7 ± 0.0 | ND        |
| 2                   |            | 0.4 ± 0.2         | 1.1 ± 0.3 | 0.3 ± 0.0 |            | 1.2 ± 0.2         | <0.1      | ND        |
| 3                   |            | 1.2 ± 0.2         | 1.0 ± 0.2 | 0.2 ± 0.1 |            | 1.4 ± 0.2         | ND        | ND        |
| 4                   |            | 1.3 ± 0.0         | 0.8 ± 0.0 | 0.2 ± 0.0 |            | 2.0 ± 0.0         | ND        | ND        |
| 5                   |            | 1.3 ± 0.3         | 0.9 ± 0.1 | 0.2 ± 0.0 |            | 2.2 ± 0.2         | ND        | ND        |
| 6                   |            | 1.6 ± 0.1         | 1.0 ± 0.0 | 0.2 ± 0.0 |            | 2.0 ± 0.2         | ND        | ND        |
| 7                   |            | 1.9 ± 0.2         | 1.1 ± 0.1 | 0.3 ± 0.0 |            | 2.1 ± 0.1         | ND        | ND        |
| 8                   |            | 1.9 ± 0.1         | 0.9 ± 0.1 | 0.1 ± 0.0 |            | 3.0 ± 0.3         | ND        | ND        |
| 9                   |            | 1.8 ± 0.1         | 1.0 ± 0.0 | 0.1 ± 0.0 |            | 2.5 ± 0.2         | ND        | ND        |
| 10                  |            | 2.0 ± 0.3         | 1.1 ± 0.0 | 0.2 ± 0.0 |            | 2.9 ± 0.1         | ND        | ND        |

<sup>a</sup> Enzymes combination 1: TbXyn10A; 2: TbXyn10A and TbXyl39A; 3: TbXyn10A and TbXyl52A; 4: TbXyn10A, TbXyl39A and TbXyl52A; 5: TbXyn10A, TbXyl39A, TbXyl52A and TbHEOA; 6: TbXyn10A, TbXyl39A, TbXyl52A and TbHEOB; 7: TbXyn10A, TbXyl39A, TbXyl52A, TbHEOA and TbHEOB; 8: TbXyn10A, TbXyl39A, TbXyl52A, TbHEOA, TbHEOB and TbAgu67A; 9: TbXyn10A, TbXyl39A, TbXyl52A, TbHEOA, TbHEOB and TbAxe1A; 10: TbXyn10A, TbXyl39A, TbXyl52A, TbHEOA, TbHEOB, TbAgu67A and TbAxe1A; <sup>b</sup> ND: not detected. <sup>c</sup> Abbreviations were X1: xylose; X2: xylobiose; X3: xylotriose.

**Supplemental Table S4.** Conservations of two adjacent oxidoreductases (TbHEOA and TbHEOB) from *T. bryantii* in other bacteria.

| Source                                                        |               | Predicted Function                       | Amino Acid Identities |        |
|---------------------------------------------------------------|---------------|------------------------------------------|-----------------------|--------|
| Strains                                                       | GenBank no.   |                                          | TbHEOA                | TbHEOB |
| <i>Thermoanaerobacterium thermosaccharolyticum</i><br>DSM 571 | ADL68510.1    | oxidoreductase domain protein            | 95%                   | /      |
|                                                               | ADL68511.1    |                                          | /                     | 96%    |
| <i>Thermoanaerobacterium xylanolyticum</i> LX-11              | AEF17767.1    | oxidoreductase domain protein            | 91%                   | /      |
|                                                               | AEF17766.1    |                                          | /                     | 92%    |
| <i>Thermoanaerobacterium saccharolyticum</i><br>JW/SL-YS485   | AFK86456.1    | oxidoreductase domain protein            | 90%                   | /      |
|                                                               | AFK86457.1    |                                          | /                     | 92%    |
| <i>Thermoanaerobacter italicus</i> Ab9                        | ADD01506.1    | oxidoreductase domain protein            | 75%                   | /      |
|                                                               | ADD01507.1    |                                          | /                     | 81%    |
| <i>Thermoanaerobacter mathranii</i> subsp.                    | ADH60019.1    | oxidoreductase domain protein            | 74%                   | /      |
|                                                               | ADH60020.1    |                                          | /                     | 81%    |
| <i>Paenibacillus</i> sp. oral taxon 786 str. D14              | EES74063.1    | oxidoreductase                           | 63%                   | /      |
|                                                               | EES74062.1    |                                          | /                     | 64%    |
| <i>Paenibacillus</i> sp. JDR-2                                | ACT03815.1    | oxidoreductase domain protein            | 63%                   | /      |
|                                                               | ACT03814.1    |                                          | /                     | 63%    |
| <i>Rahnella</i> sp. Y9602                                     | ADW72798.1    | oxidoreductase domain protein            | 60%                   | /      |
|                                                               | ADW72799.1    |                                          | /                     | 64%    |
| <i>Hafnia alvei</i> ATCC 51873                                | EHM43730.1    | putative dehydrogenase                   | 60%                   | /      |
|                                                               | EHM43731.1    |                                          | /                     | 62%    |
| <i>Enterobacteriaceae</i> bacterium 9_2_54FAA                 | EFV40373.1    | oxidoreductase                           | 60%                   | /      |
|                                                               | EFV40372.1    |                                          | /                     | 62%    |
| <i>Enterobacter cancerogenus</i> ATCC 35316                   | EFC53861.1    | oxidoreductase                           | 60%                   | /      |
|                                                               | EFC53860.1    |                                          | /                     | 64%    |
| <i>Enterobacter mori</i> LMG 25706                            | ZP_09036120.1 | hypothetical protein                     | 59%                   | /      |
|                                                               | ZP_09036121.1 | EmorL2_03392                             | /                     | 65%    |
| <i>Enterobacter hormaechei</i> ATCC 49162                     | EGK61318.1    | oxidoreductase                           | 58%                   | /      |
|                                                               | EGK61319.1    |                                          | /                     | 65%    |
| <i>Enterobacter cloacae</i> subsp. <i>cloacae</i> ATCC 13047  | ADF60186.1    | hypothetical protein ECL_00620           | 58%                   | /      |
|                                                               | ADF60185.1    |                                          | /                     | 65%    |
| <i>Enterobacter cloacae</i> EcWSU1                            | AEW71857.1    | glucose--fructose oxidoreductase         | 58%                   | /      |
|                                                               | AEW71856.1    |                                          | /                     | 64%    |
| <i>Pantoea</i> sp. Sc1                                        | EIB96373.1    | oxidoreductase                           | 57%                   | /      |
|                                                               | EIB96374.1    |                                          | /                     | 63%    |
| <i>Pantoea stewartii</i> subsp. <i>stewartii</i> DC283        | EHU00915.1    | oxidoreductase domain protein            | 56%                   | /      |
|                                                               | EHU00916.1    |                                          | /                     | 62%    |
| <i>Lachnospiraceae</i> bacterium 3_1_57FAA_CT1                | EGN35098.1    | hypothetical protein                     | 53%                   | /      |
|                                                               | EGN35097.1    | HMPREF0994_04650                         | /                     | 63%    |
| <i>Clostridiales</i> bacterium 1_7_47FAA                      | EEQ58458.1    | oxidoreductase domain-containing protein | 48%                   | /      |
|                                                               | EEQ58457.1    |                                          | /                     | 54%    |
| <i>Clostridium citroniae</i> WAL-17108                        | EHE96106.1    | hypothetical protein                     | 48%                   | /      |
|                                                               | EHE96107.1    | HMPREF9469_04981                         | /                     | 56%    |
| <i>Kineococcus radiotolerans</i> SRS30216                     | ABS02075.1    | Oxidoreductase domain                    | 49%                   | /      |
|                                                               | ABS02074.1    |                                          | /                     | 57%    |
| <i>Xylanimonas cellulosilytica</i> DSM 15894                  | ACZ30672.1    | oxidoreductase domain protein            | 49%                   | /      |
|                                                               | ACZ30671.1    |                                          | /                     | 60%    |
| <i>Clostridium phytofermentans</i> ISDg                       | ABX40986.1    | oxidoreductase domain protein            | 46%                   | /      |
|                                                               | ABX40987.1    |                                          | /                     | 57%    |
| <i>Sphaerochaeta globus</i> str. Buddy                        | ADY11936.1    | oxidoreductase domain protein            | 45%                   | /      |
|                                                               | ADY11935.1    |                                          | /                     | 52%    |

**Supplemental Table S5.** Nucleotide sequences of primers used for cloning of the genes in the hemicellulase gene cluster.

| Gene     | Primer direction | Primer sequences <sup>a</sup>                             |
|----------|------------------|-----------------------------------------------------------|
| TbXyn10A | Forward          | 5'- <u>GACGACGACAAGAT</u> GCCTTCAAAGGGAAAAATG-3'          |
|          | Reverse          | 5'-GAGGAGAAGCCCGGTAAAAATCAACTATGCTGTAAAAG-3'              |
| TbAgu67A | Forward          | 5'- <u>GACGACGACAAGAT</u> GTACGACTGCTGGCTTAGGTATAAG-3'    |
|          | Reverse          | 5'-GAGGAGAAGCCCGGTATTCATAAATTTTCCTCCATG-3'                |
| TbHEOA   | Forward          | 5'- <u>GACGACGACAAGAT</u> GATTAATATAGCCATTATTGGCGC-3'     |
|          | Reverse          | 5'-GAGGAGAAGCCCGGTACTTAATATCTCTTCCAAATG-3'                |
| TbHEOB   | Forward          | 5'- <u>GACGACGACAAGAT</u> GAGCAAAGAAAACGGCATGTAC-3'       |
|          | Reverse          | 5'-GAGGAGAAGCCCGGTCATTCTACCTTTATTGCATTTG-3'               |
| TbXyl52A | Forward          | 5'- <u>GACGACGACAAGAT</u> GATAAGTAAATCTTTTATGCGC-3'       |
|          | Reverse          | 5'-GAGGAGAAGCCCGGTATTTTCATCCACAGTATGCTGG-3'               |
| TbXyl39A | Forward          | 5'- <u>GACGACGACAAGAT</u> GATAAAAAATAAAGATACCAAAAAATTC-3' |
|          | Reverse          | 5'-GAGGAGAAGCCCGGTCAATATCCGTTTATCTTGCTATC-3'              |
| TbAxe1A  | Forward          | 5'- <u>GACGACGACAAGAT</u> TGGGACTTTTTGATATGCCATTAC-3'     |
|          | Reverse          | 5'-GAGGAGAAGCCCGGTAAAGCTCCAGTAAAAATTGC-3'                 |

<sup>a</sup>: Underlined nucleotides are added to facilitate ligation-independent cloning into a pET46-Ek/LIC vector.

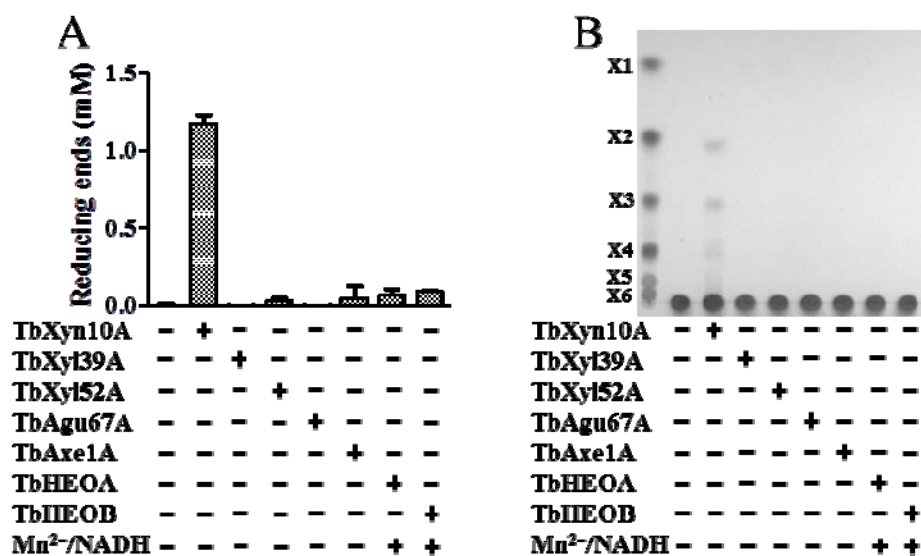

**Supplemental Figure S1.** Hydrolysis of birchwood xylan (BWV) by a single enzyme (TbXyn10A, TbXyl39A, TbXyl52A, TbHEOA, TbHEOB, TbAgu67A or TbAxe1A) in the gene cluster as analyzed by reducing sugar assay (A) and TLC (B). Five mg/mL of BWV was incubated with each enzyme (10 nM TbXyn10A, 10 nM TbXyl39A, 5 nM TbXyl52A, 100 nM TbAgu67A, 100 nM TbAxe1A, 100 nM TbHEOA or 100 nM TbHEOB) at 60 °C in a citrate buffer (pH 5.5) for 16 h, in the presence or absence of cofactors (1 mM NADH and 1 mM MnSO<sub>4</sub>).

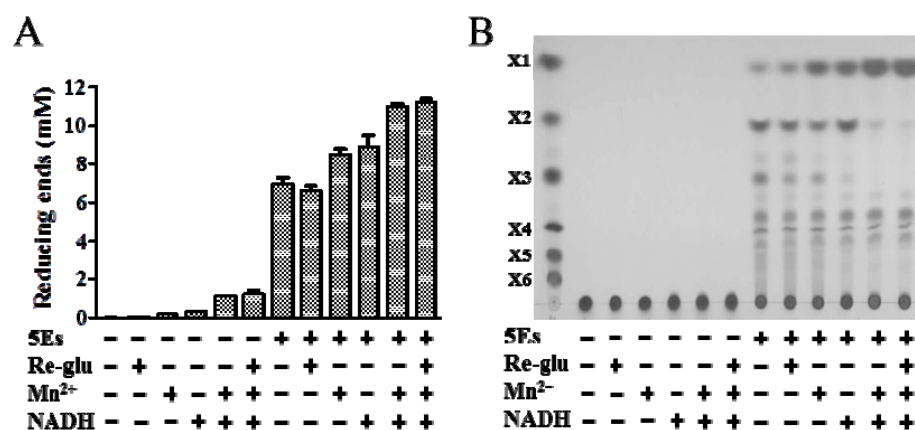

**Supplemental Figure S2.** Effects of redox-active cofactors and Mn<sup>2+</sup> ion on the capacity of two new oxidoreductase-like proteins (TbHEOA and TbHEOB) to enhance hydrolysis of BWX by three enzymes mixture composed of TbXyn10A, TbXyl39A, and TbXyl52A. The end products were analyzed by reducing sugar assay (A) and TLC (B). Five mg/mL BWX was incubated with and without five enzymes mixture (10 nM TbXyn10A, 10 nM TbXyl39A, 5 nM TbXyl52A, 50 nM TbHEOA, and 50 nM TbHEOB) at 60 °C in a citrate buffer (pH 5.5) in the presence or absence of cofactors (1 mM NADH, 1 mM Mn<sup>2+</sup> or 0.5 mM Re-glu) for 20 h. 5Es: 5 enzymes mixtures (TbXyn10A, TbXyl39A, TbXyl52A, TbHEOA, and TbHEOB). Other abbreviations were as follows: X1: xylose; X2: xylobiose; X3: xylotriose; X4: xylotetraose; X5: xlopentaose; X6: xylohexaose.

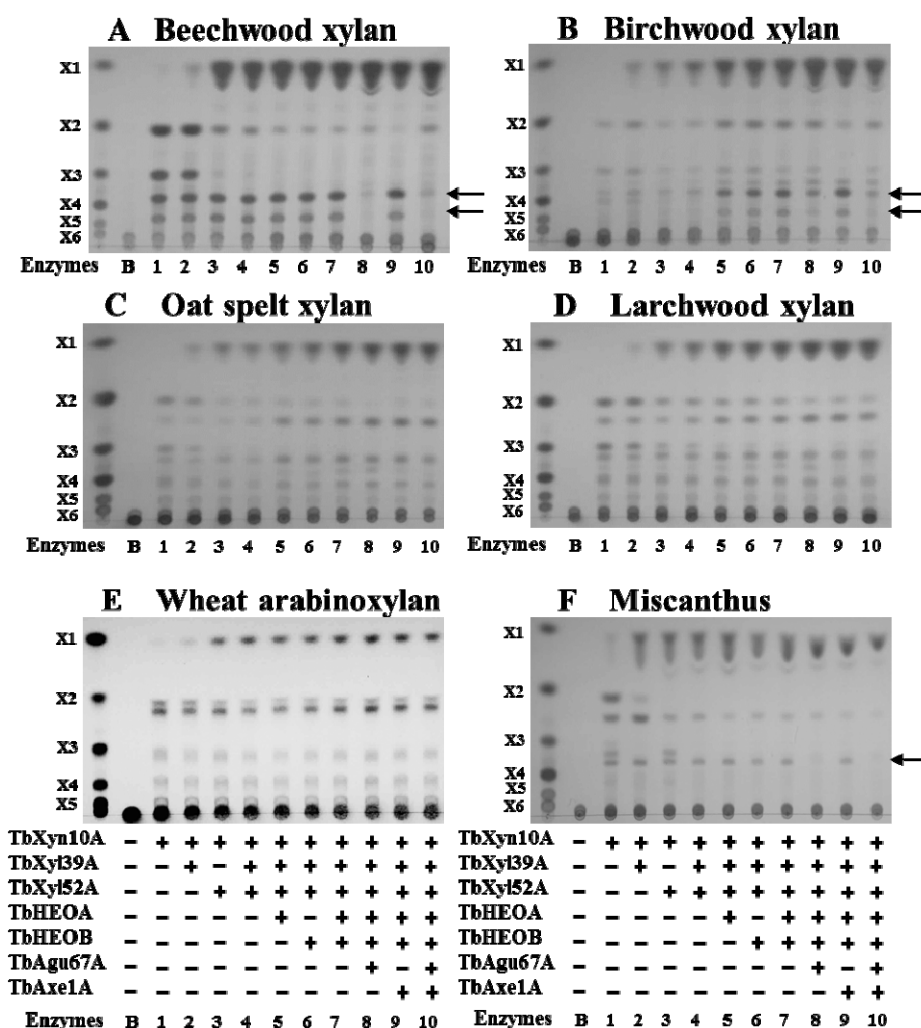

**Supplemental Figure S3.** The synergistic effect of the seven enzymes encoded in the *T. bryantii* hemicellulase gene cluster during hydrolysis of heterogeneous xylans (A–E) and Miscanthus (F). The enzymatic reactions were carried out at 60 °C in a pH 5.5 citrate buffer supplemented with 1.0 mM NADH and 1.0 mM Mn<sup>2+</sup>. The substrates (BeeWX, BWX, LWX, and OSX) at 5 mg/mL were incubated with different combinations of the seven enzymes for 16 h. In the case of WAX, a lower concentration of substrate (2.5 mg/mL) was incubated with a lower concentration of enzymes (5 nM TbXyn10A, 5 nM TbXyl39A, 2.5 nM TbXyl52A, 50 nM TbAgu67A, 50 nM TbAxe1A, 25 nM TbHEOA, and 25 nM TbHEOB) for 16 h. Miscanthus was incubated at a higher concentration of substrate loading (10 mg/mL) with higher concentrations of enzymes (1 μM TbXyn10A, 0.5 μM TbXyl39A, 0.5 μM TbXyl52A, 2 μM TbHEOA, 2 μM TbHEOB, 2 μM TbAgu67A, and 2 μM TbAxe1A) for a longer period of 21 h. The end products were analyzed by TLC. (B): is a control of substrate without enzyme.



|                      |                                                                                        |     |
|----------------------|----------------------------------------------------------------------------------------|-----|
| TbHEOA               | MIN.....IAIIGAGNISSAHLQGFLEFKDRCKIVISDIYKDKAEKKRRFGLNDATVY                             | 55  |
| TbHEOB               | MSKENGMYMPESRAKKVCS.....EGDFFFAAIGLDHGHYGMTKGLIEAGAEVKWVYDHDPEKVERFIKAFPIAK            | 72  |
| GFO                  | ATLPAGASQVFTTFAGREMPFYAIREMPEDRRFGYAIVGLGKYALNQILPGFAGCQHSRIEALVSGNAEKAKIVAAEYGVDPKRIY | 85  |
| IDH                  | MSLR.....IGVIGTGAIGKEHINRITNKLSGAEIVVTDVNQEAAQKVVEQYQLN.ATVY                           | 55  |
| MocA                 | MTFRFR.....LGLVGAGRMGQVFEVR.....AAESSLVEIAAVADPIAASRLNLAGNGIK                          | 50  |
| Consensus            |                                                                                        |     |
| TbHEOA               | ..SDYREILKREDVINDICTEPYTHADIAVESLNAGKNVIVKPMASLEECDRMIEASRKN.KKLLSVIAQNRFRTQFMKIKK     | 137 |
| TbHEOB               | KARDEDEILMNSVKLVASAAIPSECAIGLKAMDAGKDYFAKPEPMTTREQLEQAKDKVKKTKRKYAVVYGERLHNEASVYAGQ    | 157 |
| GFO                  | DYSNFDKIAKDPKIDAYIILFNSLHAEFAIRAFKAGKHVMCKPMATSVADCCQRMIDAAKAA.NKKLMIGYRCHYDPMNRAAVK   | 169 |
| IDH                  | ..PNDDSLLADENVDALVTSWGPAAHESSVLKAIKCKYVFCBKPLATTAE.GCMRIVEEEIKVGKRLVQVGFMRRYDSGYVQLKE  | 138 |
| MocA                 | TYETAGDMIEAGEVGLIATFSNTHVDTVADIAARGLPILOKPCGVTAFEARKAAVAERY.KVHLQIGYWRRFVPELKQLRD      | 134 |
| Consensus<br>v<br>kp |                                                                                        |     |
| TbHEOA               | IVESGLAGDIVHAQVDSFWWRGHSYDYLWWRGTWEKEGGCTLNHAIHHIDMLIWLIG.MFEEVQAVMNNVAHDN..AEVEDISI   | 219 |
| TbHEOB               | LVEKGATGRVIQVIGMGPHREKGRPDWFYE...KDKFGGILCIGSHQIEQFLYYTGAKDARVQSAKVANYNHKQYPTFEDFGD    | 239 |
| GFO                  | LIRENQIKGLGMVITDNSDVMQNDPAQQWRLRRELAGGSLMDIGIYGLNGTRYLLGEEPIEVRAYTYS.DNDERFVEVEDRII    | 254 |
| IDH                  | ALDNHVNGEPLMIHCAHRNPTVGDN.....YTTIMAVVDTLVHEIDVLHVLVN.DDYESVQVIYPKKSKNALPHLKDPQI       | 212 |
| MocA                 | DIRAGLLGNLYLVSCFQWDEAPPAN.....SFRATGGGAFIDMGVHEFLQMRWLITQEETNFRVATSKTTFAGAVKGDPLAVQ    | 212 |
| Consensus<br>g<br>d  |                                                                                        |     |
| TbHEOA               | AILKYKSGALTQITSSV.VHHGEEQQIILQGGKARISVFWKVVASTASSNGFFPSGRDEELEKKIQDYYDSLEETKYSGHTPCIDD | 303 |
| TbHEOB               | VTLIGDNGATGYFRLDWFTPDGLG...TWGDGRFLILGADGYIELR.....KYIDVARENTTDHVYLANKDG               | 303 |
| GFO                  | WQMRFRSGALSHGASSY.STTTTSRFSVQGGKAVLLMDPATGYYNLISVQTPGHAN.....QSMMPQFIMPANNQFSAQLDH     | 331 |
| IDH                  | VVIETKGGIVINAEIYVNCKYGYDIQCEIVGEDGIKLEPSSISLRKEGRFS.....TDILMDWQRRFVAAYDVEIQD          | 286 |
| MocA                 | LLCDLSGSSGLVSLGRRFPFGDACWTQVFGTSGFAEARFFWP.....PDGEAVFLNALQAQLED                       | 272 |
| Consensus<br>g       |                                                                                        |     |
| TbHEOA               | VLKALESEHEIL.VKGS.DGRNALELITAIYKAATTREVVKLPINKDDPFYTVDGIMSSVPHFYERKTFVENFNDERITFGRDI   | 385 |
| TbHEOB               | EYHMDVKRGVGFPPFGELILDSINRTENAMTQEHIFKAIELALEAQTNAIKVE.....                             | 356 |
| GFO                  | LAEAVINNKPV.RFSGEEGMQDVRLIQIYEART...GRPVNTD.WGYVRQGGY.....                             | 381 |
| IDH                  | FIDSIQKKGEVSGPTAWDGYIAAVITDA CVKQESGQKEKVELKEKEPEFYQSFTTVQN.....                       | 344 |
| MocA                 | FVQAARGGAPRG.ATASDAVAALTIATATALLSR.....DINKAEGNNVR.....                                | 317 |
| Consensus            |                                                                                        |     |

**Supplemental Figure S4.** Multiple sequence alignment of TbHEOA and TbHEOB with three characterized Oxidoreductases. GFO (PDB accession number: 1OFG): a glucose-fructose oxidoreductase from *Zymomonas mobilis*; IDH: an inositol dehydrogenase from *Bacillus subtilis*; MocA: a rhizopine catabolism protein from *Rhizobium meliloti* L5-30. The conserved motif EKP is highlighted by rectangle.

|                     |                                                                                              |      |
|---------------------|----------------------------------------------------------------------------------------------|------|
| AD76185.1/1-355     | AATPSSRCALCIKVMAGKQVDFDKAPITITLEOLADKAMAEKKCKKAYVYSERLIVSSAVAGLQVCAIGVYVITCTGPHRE-GTGRDNFYD  | 1889 |
| AEW71856.1/1-355    | AATPSSRCALCIKVMAGKQVDFDKAPITITLEOLADKAMAEKKCKKAYVYSERLIVSSAVAGLQVCAIGVYVITCTGPHRE-GTGRDNFYD  | 1889 |
| EFC53660.1/1-355    | AATPSSRCALCIKVMAGKQVDFDKAPITITLEOLADKAMAEKKCKKAYVYSERLIVSSAVAGLQVCAIGVYVITCTGPHRE-GTGRDNFYD  | 1889 |
| EGK61319.1/1-355    | AATPSSRCALCIKVMAGKQVDFDKAPITITLEOLADKAMAEKKCKKAYVYSERLIVSSAVAGLQVCAIGVYVITCTGPHRE-GTGRDNFYD  | 1889 |
| TP_09036120.1/1-355 | AATPSSRCALCIKVMAGKQVDFDKAPITITLEOLADKAMAEKKCKKAYVYSERLIVSSAVAGLQVCAIGVYVITCTGPHRE-GTGRDNFYD  | 1889 |
| ETB96374.1/1-354    | AATPSSRCALCIKVMAGKQVDFDKAPITITLEOLADKAMAEKKCKKAYVYSERLIVSSAVAGLQVCAIGVYVITCTGPHRE-GTGRDNFYD  | 1889 |
| EHU00916.1/1-354    | AATPSSRCALCIKVMAGKQVDFDKAPITITLEOLADKAMAEKKCKKAYVYSERLIVSSAVAGLQVCAIGVYVITCTGPHRE-GTGRDNFYD  | 1889 |
| EHM43731.1/1-357    | ACHTBASRCALCIKVMAGKQVDFDKAPITITLEOLADKAMAEKKCKKAYVYSERLIVSSAVAGLQVCAIGVYVITCTGPHRE-GTGRDNFYD | 1889 |
| AEF70372.1/1-357    | ACHTBASRCALCIKVMAGKQVDFDKAPITITLEOLADKAMAEKKCKKAYVYSERLIVSSAVAGLQVCAIGVYVITCTGPHRE-GTGRDNFYD | 1889 |
| ADW27299.1/1-355    | ACHTBASRCALCIKVMAGKQVDFDKAPITITLEOLADKAMAEKKCKKAYVYSERLIVSSAVAGLQVCAIGVYVITCTGPHRE-GTGRDNFYD | 1889 |
| ABS02074.1/1-362    | AATDAGRCALCIKVMAGKQVDFDKAPITITLEOLADKAMAEKKCKKAYVYSERLIVSSAVAGLQVCAIGVYVITCTGPHRE-GTGRDNFYD  | 1889 |
| AC230671.1/1-360    | AATVTSRAALCIKVMAGKQVDFDKAPITITLEOLADKAMAEKKCKKAYVYSERLIVSSAVAGLQVCAIGVYVITCTGPHRE-GTGRDNFYD  | 1889 |
| EGN35097.1/1-359    | ACVTSRAALCIKVMAGKQVDFDKAPITITLEOLADKAMAEKKCKKAYVYSERLIVSSAVAGLQVCAIGVYVITCTGPHRE-GTGRDNFYD   | 1889 |
| ACT03814.1/1-357    | AATVTSRAALCIKVMAGKQVDFDKAPITITLEOLADKAMAEKKCKKAYVYSERLIVSSAVAGLQVCAIGVYVITCTGPHRE-GTGRDNFYD  | 1889 |
| THE080/1-356        | AATPSSRCALCIKVMAGKQVDFDKAPITITLEOLADKAMAEKKCKKAYVYSERLIVSSAVAGLQVCAIGVYVITCTGPHRE-GTGRDNFYD  | 1889 |
| ADL68511.1/1-356    | AATPSSRCALCIKVMAGKQVDFDKAPITITLEOLADKAMAEKKCKKAYVYSERLIVSSAVAGLQVCAIGVYVITCTGPHRE-GTGRDNFYD  | 1889 |
| AEF17766.1/1-356    | AATPSSRCALCIKVMAGKQVDFDKAPITITLEOLADKAMAEKKCKKAYVYSERLIVSSAVAGLQVCAIGVYVITCTGPHRE-GTGRDNFYD  | 1889 |
| AFK86455.1/1-356    | AATPSSRCALCIKVMAGKQVDFDKAPITITLEOLADKAMAEKKCKKAYVYSERLIVSSAVAGLQVCAIGVYVITCTGPHRE-GTGRDNFYD  | 1889 |
| AD015007.1/1-356    | AATPSSRCALCIKVMAGKQVDFDKAPITITLEOLADKAMAEKKCKKAYVYSERLIVSSAVAGLQVCAIGVYVITCTGPHRE-GTGRDNFYD  | 1889 |
| ADH60020.1/1-356    | AATPSSRCALCIKVMAGKQVDFDKAPITITLEOLADKAMAEKKCKKAYVYSERLIVSSAVAGLQVCAIGVYVITCTGPHRE-GTGRDNFYD  | 1889 |
| EES74602.1/1-360    | ACVTSRAALCIKVMAGKQVDFDKAPITITLEOLADKAMAEKKCKKAYVYSERLIVSSAVAGLQVCAIGVYVITCTGPHRE-GTGRDNFYD   | 1889 |
| EH696107.1/1-359    | ACVTSRAALCIKVMAGKQVDFDKAPITITLEOLADKAMAEKKCKKAYVYSERLIVSSAVAGLQVCAIGVYVITCTGPHRE-GTGRDNFYD   | 1889 |
| EES8457.1/1-363     | AATPSSRCALCIKVMAGKQVDFDKAPITITLEOLADKAMAEKKCKKAYVYSERLIVSSAVAGLQVCAIGVYVITCTGPHRE-GTGRDNFYD  | 1889 |
| ABX40987.1/1-362    | AATPSSRCALCIKVMAGKQVDFDKAPITITLEOLADKAMAEKKCKKAYVYSERLIVSSAVAGLQVCAIGVYVITCTGPHRE-GTGRDNFYD  | 1889 |
| AEU11935.1/1-361    | AATPSSRCALCIKVMAGKQVDFDKAPITITLEOLADKAMAEKKCKKAYVYSERLIVSSAVAGLQVCAIGVYVITCTGPHRE-GTGRDNFYD  | 1889 |
| THE080/1-386        | AATPSSRCALCIKVMAGKQVDFDKAPITITLEOLADKAMAEKKCKKAYVYSERLIVSSAVAGLQVCAIGVYVITCTGPHRE-GTGRDNFYD  | 1889 |
| ADL68510.1/1-386    | AATPSSRCALCIKVMAGKQVDFDKAPITITLEOLADKAMAEKKCKKAYVYSERLIVSSAVAGLQVCAIGVYVITCTGPHRE-GTGRDNFYD  | 1889 |
| AEF17767.1/1-386    | AATPSSRCALCIKVMAGKQVDFDKAPITITLEOLADKAMAEKKCKKAYVYSERLIVSSAVAGLQVCAIGVYVITCTGPHRE-GTGRDNFYD  | 1889 |
| AFK86456.1/1-386    | AATPSSRCALCIKVMAGKQVDFDKAPITITLEOLADKAMAEKKCKKAYVYSERLIVSSAVAGLQVCAIGVYVITCTGPHRE-GTGRDNFYD  | 1889 |
| AD015006.1/1-385    | AATPSSRCALCIKVMAGKQVDFDKAPITITLEOLADKAMAEKKCKKAYVYSERLIVSSAVAGLQVCAIGVYVITCTGPHRE-GTGRDNFYD  | 1889 |
| ADH60019.1/1-385    | AATPSSRCALCIKVMAGKQVDFDKAPITITLEOLADKAMAEKKCKKAYVYSERLIVSSAVAGLQVCAIGVYVITCTGPHRE-GTGRDNFYD  | 1889 |
| EES74603.1/1-383    | AATPSSRCALCIKVMAGKQVDFDKAPITITLEOLADKAMAEKKCKKAYVYSERLIVSSAVAGLQVCAIGVYVITCTGPHRE-GTGRDNFYD  | 1889 |
| ACT03815.1/1-385    | AATPSSRCALCIKVMAGKQVDFDKAPITITLEOLADKAMAEKKCKKAYVYSERLIVSSAVAGLQVCAIGVYVITCTGPHRE-GTGRDNFYD  | 1889 |
| EHM43730.1/1-397    | AATPSSRCALCIKVMAGKQVDFDKAPITITLEOLADKAMAEKKCKKAYVYSERLIVSSAVAGLQVCAIGVYVITCTGPHRE-GTGRDNFYD  | 1889 |
| EFY40373.1/1-397    | AATPSSRCALCIKVMAGKQVDFDKAPITITLEOLADKAMAEKKCKKAYVYSERLIVSSAVAGLQVCAIGVYVITCTGPHRE-GTGRDNFYD  | 1889 |
| ADW27298.1/1-391    | AATPSSRCALCIKVMAGKQVDFDKAPITITLEOLADKAMAEKKCKKAYVYSERLIVSSAVAGLQVCAIGVYVITCTGPHRE-GTGRDNFYD  | 1889 |
| TP_09036120.1/1-389 | AATPSSRCALCIKVMAGKQVDFDKAPITITLEOLADKAMAEKKCKKAYVYSERLIVSSAVAGLQVCAIGVYVITCTGPHRE-GTGRDNFYD  | 1889 |
| ZF_006186.1/1-394   | AATPSSRCALCIKVMAGKQVDFDKAPITITLEOLADKAMAEKKCKKAYVYSERLIVSSAVAGLQVCAIGVYVITCTGPHRE-GTGRDNFYD  | 1889 |
| AEW71857.1/1-405    | AATPSSRCALCIKVMAGKQVDFDKAPITITLEOLADKAMAEKKCKKAYVYSERLIVSSAVAGLQVCAIGVYVITCTGPHRE-GTGRDNFYD  | 1889 |
| EFC53661.1/1-404    | AATPSSRCALCIKVMAGKQVDFDKAPITITLEOLADKAMAEKKCKKAYVYSERLIVSSAVAGLQVCAIGVYVITCTGPHRE-GTGRDNFYD  | 1889 |
| EHU66373.1/1-389    | AATPSSRCALCIKVMAGKQVDFDKAPITITLEOLADKAMAEKKCKKAYVYSERLIVSSAVAGLQVCAIGVYVITCTGPHRE-GTGRDNFYD  | 1889 |
| EHU00915.1/1-389    | AATPSSRCALCIKVMAGKQVDFDKAPITITLEOLADKAMAEKKCKKAYVYSERLIVSSAVAGLQVCAIGVYVITCTGPHRE-GTGRDNFYD  | 1889 |
| EGN35098.1/1-387    | AATPSSRCALCIKVMAGKQVDFDKAPITITLEOLADKAMAEKKCKKAYVYSERLIVSSAVAGLQVCAIGVYVITCTGPHRE-GTGRDNFYD  | 1889 |
| ABS02075.1/1-391    | AATPSSRCALCIKVMAGKQVDFDKAPITITLEOLADKAMAEKKCKKAYVYSERLIVSSAVAGLQVCAIGVYVITCTGPHRE-GTGRDNFYD  | 1889 |
| AC230672.           |                                                                                              |      |



[illegible]

|                     |                                    |     |
|---------------------|------------------------------------|-----|
| ADF60185.1/1-355    | -----                              | 355 |
| AEW71856.1/1-355    | -----                              | 355 |
| EFC53860.1/1-355    | -----                              | 355 |
| EGK61319.1/1-355    | -----                              | 355 |
| ZP_09036121.1/1-355 | -----                              | 355 |
| EIB96374.1/1-354    | -----                              | 354 |
| EHU00916.1/1-354    | -----                              | 354 |
| EHM43731.1/1-357    | -----                              | 357 |
| EFV40372.1/1-357    | -----                              | 357 |
| ADW72799.1/1-355    | -----                              | 355 |
| ABS02074.1/1-362    | -----                              | 362 |
| ACZ30671.1/1-360    | -----                              | 360 |
| EGN35097.1/1-359    | -----                              | 359 |
| ACT03814.1/1-357    | -----                              | 357 |
| TbHEOB/1-356        | -----                              | 356 |
| ADL68511.1/1-356    | -----                              | 356 |
| AEF17766.1/1-356    | -----                              | 356 |
| AFK86457.1/1-356    | -----                              | 356 |
| ADD01507.1/1-356    | -----                              | 356 |
| ADH60020.1/1-356    | -----                              | 356 |
| EES74062.1/1-360    | -----                              | 360 |
| EHE96107.1/1-359    | -----                              | 359 |
| EEQ58457.1/1-363    | -----                              | 363 |
| ABX40987.1/1-362    | -----                              | 362 |
| ADY11935.1/1-361    | -----                              | 361 |
| TbHEOA/1-386        | HFYEKKTFVENFNDER-ITFGRDIK-----     | 386 |
| ADL68510.1/1-386    | HFYEKKTFVENFNDER-ITFGREIK-----     | 386 |
| AEF17767.1/1-386    | HFYEKKTFVENFNDER-ITFGRDIK-----     | 386 |
| AFK86456.1/1-386    | HFYEKKTFVENFNDER-ITFGREIK-----     | 386 |
| ADD01506.1/1-385    | YFHKKTFIENFDEN-ITFGRII-----        | 385 |
| ADH60019.1/1-385    | YFYKKTFIENFDEN-ITFGRII-----        | 385 |
| EES74063.1/1-383    | YFYKKTSIENFSDNT-ITSGGNS-----       | 383 |
| ACT03815.1/1-385    | HFYEKASVENFSDRA-ITGSGNLRG-----     | 385 |
| EHM43730.1/1-397    | HFYEKASVENFSDGEIPLGKMDKMSSEVSA     | 397 |
| EFV40373.1/1-397    | HFHEKASVENFSDGEIPLGKMDKMSSEVSA     | 397 |
| ADW72798.1/1-391    | HFYEKASVENFANEDAIPLGKNMDKGA-----   | 391 |
| ZP_09036120.1/1-389 | RFYEKASVANFSEVGAIPLGKDL-----       | 389 |
| ADF60186.1/1-394    | RFYEKASVANFSEVGAIPLGKDLDEGVTP----- | 394 |
| AEW71857.1/1-405    | RFHEKASVANFSEVGAIPLGKDLDRGI-----   | 405 |
| EFC53861.1/1-404    | RFYEKSTSVANFSEVGAIPLGKDLDRGV-----  | 404 |
| EIB96373.1/1-389    | HFYEKQCSVENFADVDDIPLGKNFA-----     | 389 |
| EHU00915.1/1-389    | HFYEKQASVENFADEDAIPLGKNFA-----     | 389 |
| EGN35098.1/1-387    | HFYEKASVENFTSGE-ITVGNV-----        | 387 |
| ABS02075.1/1-391    | RFPAKSASVTDLAGSISVPGSGAGIGAGR----- | 391 |
| ACZ30672.1/1-388    | RYFTKTGSVDE-----PGEPTYTYGGSPAPTF   | 388 |
| EEQ58458.1/1-383    | RFNEKKKSVENYADTG-IKVGCTL-----      | 383 |
| ABX40986.1/1-383    | KPNKTKSVENFQDIG-ISVGGTL-----       | 383 |
| EHE96106.1/1-385    | HFPEKTKSVENFEKVE-ITLGRDVCK-----    | 385 |
| ADY11936.1/1-384    | RFHTKGKSVDNFSTSK-ITLGRDFNA-----    | 384 |

**Supplemental Figure S5.** Multiple sequence alignment using Clustal Omega of the two HEOs from *T. bryantii* with putative functional homologs occurring as adjacent genes in other bacteria. GenBank accession numbers of the oxidoreductase-like proteins are the same as listed in Supplemental Table 5. The amino acids are shaded based on conservation. Residues with 50% or more identity in the aligned sequences are shaded in black. Amino acids with similar properties (grouped as GAVLI, FYW, CM, ST, KRH, DENQ, P) in 50% or more of the aligned sequences are shaded in grey.
